# Supplementary material for: Impact of water on the BrO + HO2gas-phase reaction: mechanism, kinetics and products
Source: Royal Society of Chemistry journal article supplement (doi:10.1039/c9cp03612a), 2019-01-01
Supplement: c9cp03612a1.pdf [file c9cp03612a1.pdf]

## **Impact of water on the BrO + HO<sub>2</sub> gas-phase reaction: mechanism, kinetics and products**

Narcisse T. Tsona<sup>1</sup>, Shanshan Tang<sup>2</sup>, and Lin Du<sup>2\*</sup>

<sup>1</sup>School of Life Science, Shandong University, Binhai Road 72, Qingdao 266237, China

<sup>2</sup>Environment Research Institute, Shandong University, Binhai Road 72, Qingdao 266237, China

\*Corresponding author. E-mail: lindu@sdu.edu.cn (Lin Du)

### **Electronic Supplementary Information**

### S1. Eckart tunneling factor

By the Eckart function definition, the tunneling factor ( $\kappa$ ) is calculated by integrating the probability of transmission through the energy barrier. It takes into account the forward and reverse energy barriers  $\Delta E_f^\ddagger$  and  $E_r^\ddagger$ , respectively, and the imaginary frequency ( $\nu^\ddagger$ ) associated with the reaction coordinate of the transition state:

$$\kappa = \frac{1}{k_B T} \exp(\Delta E_f^\ddagger) \int_0^\infty p(E) \exp\left(-\frac{E}{k_B T}\right) dE$$

where

$$p(E) = 1 - \frac{\cosh[2\pi(\alpha - \beta)] + \cosh[2\pi\delta]}{\cosh[2\pi(\alpha + \beta)] + \cosh[2\pi\delta]}$$

$$\alpha = \frac{1}{2\sqrt{C}} \sqrt{E}$$

$$\beta = \frac{1}{2\sqrt{C}} \sqrt{E - A}$$

$$\delta = \frac{1}{2\sqrt{C}} \sqrt{B - C}$$

$$A = \Delta E_f^\ddagger - \Delta E_r^\ddagger$$

$$B = \sqrt{\Delta E_f^\ddagger} - \sqrt{\Delta E_r^\ddagger}$$

$$C = (\text{h.im}(\nu^\ddagger))^2 \left[ \frac{B^3}{A^2 - B^2} \right]^2$$

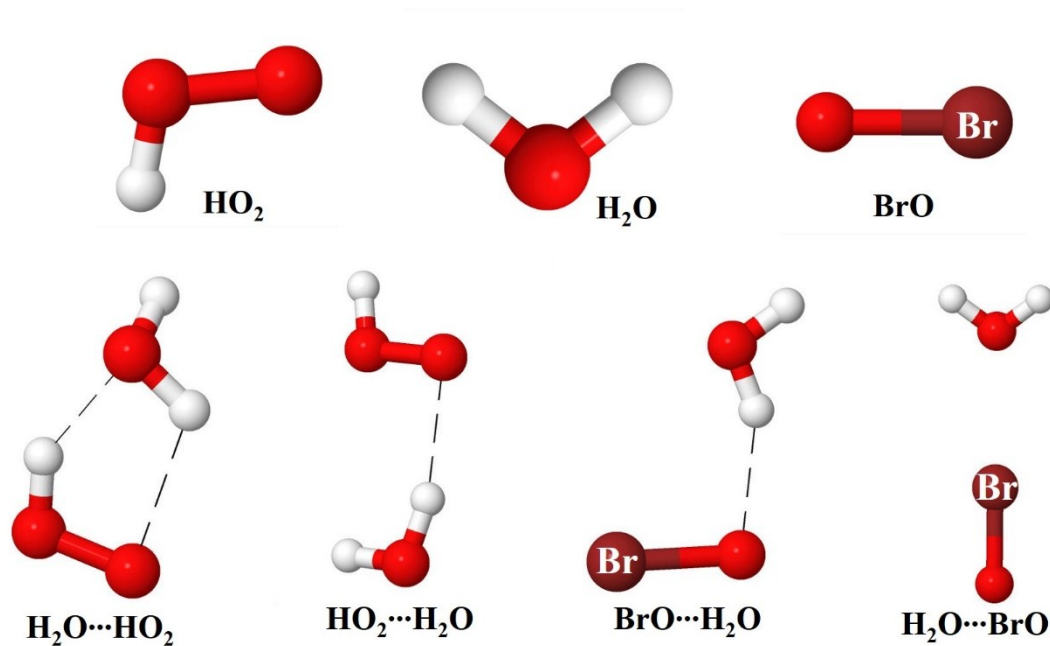

**Figure S1** Structures of all reactants optimized at the UM06-2X/AVDZ level of theory. The color coding is red for oxygen and white for hydrogen, while bromine is labelled as "Br".

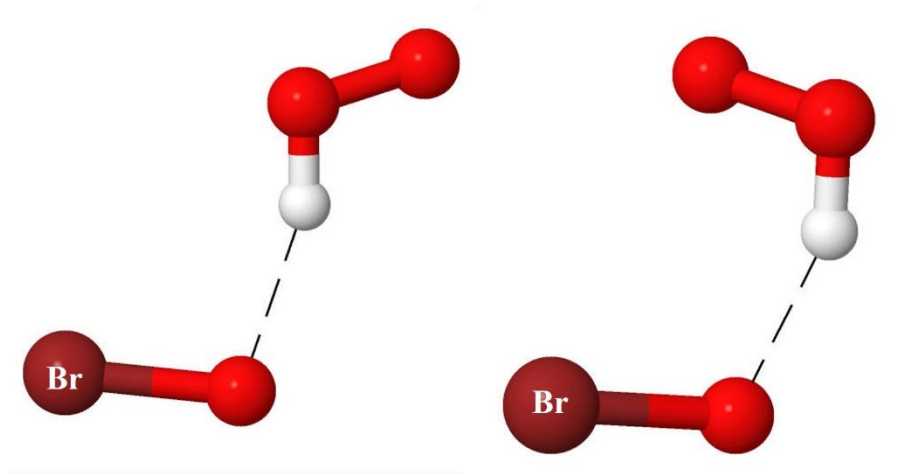

**Figure S2** Structures of  $\text{BrO}\cdots\text{H}_2\text{O}$  optimized at the UM06-2X/AVDZ level of theory, for which transition states could not be located. The color coding is red for oxygen and white for hydrogen, while bromine is labelled as "Br".

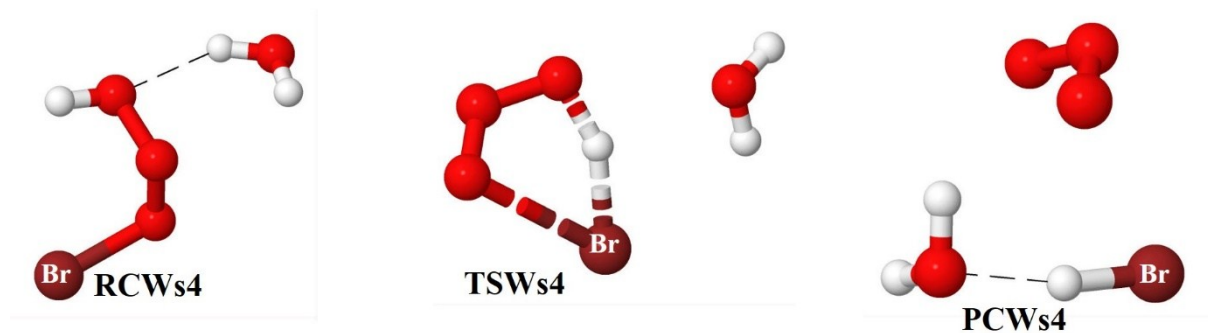

**Figure S3** Structures of all intermediate species involved in the pathway of  $\text{BrH} + \text{O}_3$  from  $\text{HO}_2 + \text{BrO} \cdots \text{H}_2\text{O}$  interaction. The structures were optimized at the UM06-2X/AVDZ level of theory. The color coding is red for oxygen and white for hydrogen, while bromine is labelled as “Br”.

**Table S1** Polarizabilities and ionization energies of all reactants involved in the  $\text{BrO} + \text{HO}_2$  reaction, calculated with the UCCSD(T)/AVTZ//UM06-2X/AVDZ method. The structures of these reactants are given in **Fig. S1**.

| Species                                 | Polarizability ( $10^{-24} \text{ cm}^3$ ) | Ionization energy ( $10^{-18} \text{ J}$ ) |
|-----------------------------------------|--------------------------------------------|--------------------------------------------|
| BrO                                     | 3.86                                       | 1.81                                       |
| $\text{BrO} \cdots \text{H}_2\text{O}$  | 5.25                                       | 1.59                                       |
| $\text{H}_2\text{O} \cdots \text{BrO}$  | 5.41                                       | 1.59                                       |
| $\text{HO}_2$                           | 1.82                                       | 1.85                                       |
| $\text{H}_2\text{O} \cdots \text{HO}_2$ | 3.18                                       | 1.67                                       |
| $\text{HO}_2 \cdots \text{H}_2\text{O}$ | 3.21                                       | 1.67                                       |

**Table S2** Calculated rate coefficients of the  $\text{BrO} + \text{HO}_2$  reaction in the absence and in the presence of one and two water molecules as a function of temperature in the range 250-350 K.

| T(K) | Singlet surface             |                              |                                                 |                                                  | Triplet surface              |                                                 |                                                  |
|------|-----------------------------|------------------------------|-------------------------------------------------|--------------------------------------------------|------------------------------|-------------------------------------------------|--------------------------------------------------|
|      | $k_{\text{HBr}+\text{O}_3}$ | $k_{\text{BrOH}+\text{O}_2}$ | $k_{\text{BrOH}+\text{O}_2+\text{H}_2\text{O}}$ | $k_{\text{BrOH}+\text{O}_2+2\text{H}_2\text{O}}$ | $k_{\text{BrOH}+\text{O}_2}$ | $k_{\text{BrOH}+\text{O}_2+\text{H}_2\text{O}}$ | $k_{\text{BrOH}+\text{O}_2+2\text{H}_2\text{O}}$ |
| 250  | $1.34 \times 10^{-21}$      | $2.15 \times 10^{-11}$       | $2.18 \times 10^{-11}$                          | $1.41 \times 10^{-10}$                           | $2.15 \times 10^{-11}$       | $2.19 \times 10^{-11}$                          | $4.75 \times 10^{-10}$                           |
| 260  | $2.54 \times 10^{-21}$      | $2.16 \times 10^{-11}$       | $2.19 \times 10^{-11}$                          | $6.29 \times 10^{-11}$                           | $2.16 \times 10^{-11}$       | $2.20 \times 10^{-11}$                          | $3.17 \times 10^{-10}$                           |
| 270  | $4.60 \times 10^{-21}$      | $2.17 \times 10^{-11}$       | $2.21 \times 10^{-11}$                          | $2.99 \times 10^{-11}$                           | $2.17 \times 10^{-11}$       | $2.22 \times 10^{-11}$                          | $2.18 \times 10^{-10}$                           |
| 280  | $8.02 \times 10^{-21}$      | $2.19 \times 10^{-11}$       | $2.22 \times 10^{-11}$                          | $1.51 \times 10^{-11}$                           | $2.19 \times 10^{-11}$       | $2.23 \times 10^{-11}$                          | $1.54 \times 10^{-10}$                           |
| 290  | $1.35 \times 10^{-20}$      | $2.20 \times 10^{-11}$       | $2.23 \times 10^{-11}$                          | $7.98 \times 10^{-12}$                           | $2.20 \times 10^{-11}$       | $2.24 \times 10^{-11}$                          | $1.12 \times 10^{-10}$                           |
| 300  | $2.20 \times 10^{-20}$      | $2.21 \times 10^{-11}$       | $2.24 \times 10^{-11}$                          | $4.42 \times 10^{-12}$                           | $2.21 \times 10^{-11}$       | $2.25 \times 10^{-11}$                          | $8.31 \times 10^{-11}$                           |

|     |                        |                        |                        |                        |                        |                        |                        |
|-----|------------------------|------------------------|------------------------|------------------------|------------------------|------------------------|------------------------|
| 310 | $3.47 \times 10^{-20}$ | $2.22 \times 10^{-11}$ | $2.26 \times 10^{-11}$ | $2.54 \times 10^{-12}$ | $2.22 \times 10^{-11}$ | $2.27 \times 10^{-11}$ | $6.29 \times 10^{-11}$ |
| 320 | $5.35 \times 10^{-20}$ | $2.24 \times 10^{-11}$ | $2.27 \times 10^{-11}$ | $1.52 \times 10^{-12}$ | $2.24 \times 10^{-11}$ | $2.28 \times 10^{-11}$ | $4.85 \times 10^{-11}$ |
| 330 | $8.04 \times 10^{-20}$ | $2.25 \times 10^{-11}$ | $2.28 \times 10^{-11}$ | $9.39 \times 10^{-13}$ | $2.25 \times 10^{-11}$ | $2.29 \times 10^{-11}$ | $3.80 \times 10^{-11}$ |
| 340 | $1.18 \times 10^{-19}$ | $2.26 \times 10^{-11}$ | $2.29 \times 10^{-11}$ | $5.98 \times 10^{-13}$ | $2.26 \times 10^{-11}$ | $2.30 \times 10^{-11}$ | $3.03 \times 10^{-11}$ |
| 350 | $1.70 \times 10^{-19}$ | $2.27 \times 10^{-11}$ | $2.30 \times 10^{-11}$ | $3.92 \times 10^{-13}$ | $2.27 \times 10^{-11}$ | $2.31 \times 10^{-11}$ | $2.45 \times 10^{-11}$ |

**Cartesian coordinates of structures shown in Figs. 1, 2, and 3 in the main manuscript, and Figs. S1 and S3 in this Supplementary Information.**

**In Fig. S1**

**H<sub>2</sub>O**

|   |            |             |             |
|---|------------|-------------|-------------|
| O | 0.00000000 | 0.00000000  | 0.11748300  |
| H | 0.00000000 | 0.76197900  | -0.46993200 |
| H | 0.00000000 | -0.76197900 | -0.46993200 |

**HO<sub>2</sub>**

|   |             |             |            |
|---|-------------|-------------|------------|
| H | -0.88299800 | -0.86566000 | 0.00000000 |
| O | 0.05518700  | -0.59956200 | 0.00000000 |
| O | 0.05518700  | 0.70776900  | 0.00000000 |

**BrO**

|    |            |            |             |
|----|------------|------------|-------------|
| Br | 0.00000000 | 0.00000000 | 0.32336000  |
| O  | 0.00000000 | 0.00000000 | -1.41470100 |

**BrO...H<sub>2</sub>O**

|    |             |             |             |
|----|-------------|-------------|-------------|
| Br | 0.79292800  | -0.20432400 | -0.00000200 |
| O  | -0.17354400 | 1.23675200  | 0.00023100  |
| O  | -2.60708700 | -0.38760900 | 0.00016000  |
| H  | -3.49377000 | -0.01660100 | 0.00166700  |
| H  | -2.01367100 | 0.37479000  | -0.00473100 |

**H<sub>2</sub>O...BrO**

|    |             |             |             |
|----|-------------|-------------|-------------|
| Br | 0.28095100  | 0.00011100  | 0.00019800  |
| O  | 2.02319600  | -0.00028900 | 0.00358200  |
| O  | -2.49078900 | -0.00005300 | -0.03787000 |
| H  | -3.04691500 | 0.76616800  | 0.13378700  |
| H  | -3.04562900 | -0.76731700 | 0.13359800  |

**H<sub>2</sub>O...HO<sub>2</sub>**

|   |             |             |             |
|---|-------------|-------------|-------------|
| H | 0.00210300  | -0.80994200 | -0.00058400 |
| O | -0.97312000 | -0.64078400 | 0.00807100  |
| O | -1.06725900 | 0.66088800  | 0.01177600  |
| O | 1.61355700  | -0.02088600 | -0.09200300 |
| H | 1.14693200  | 0.82564500  | -0.03744800 |
| H | 2.26553700  | -0.00944700 | 0.61527900  |

**HO<sub>2</sub>...H<sub>2</sub>O**

|   |             |             |             |
|---|-------------|-------------|-------------|
| H | -2.18514200 | -0.60102800 | 0.00028300  |
| O | -1.21004300 | -0.55713200 | -0.00007000 |
| O | -0.91025200 | 0.71408900  | 0.00001900  |
| O | 2.01887600  | -0.00977800 | -0.00004100 |
| H | 1.86027000  | -0.95808500 | 0.00031900  |
| H | 1.13622700  | 0.38168100  | 0.00012800  |

**In Fig. 1**

**RCs1**

|    |             |             |             |
|----|-------------|-------------|-------------|
| Br | -0.56474800 | -0.31383500 | -0.07942600 |
| O  | -0.96792700 | 1.29772900  | 0.16933700  |
| H  | 1.87771500  | 1.24343600  | 0.07724600  |
| O  | 1.99201200  | 0.36658900  | -0.32649800 |
| O  | 1.21197200  | -0.44671800 | 0.49499500  |

**TSs1**

|    |             |             |             |
|----|-------------|-------------|-------------|
| Br | -0.73476400 | -0.19846000 | -0.02668600 |
| O  | -0.08634900 | 1.39856200  | 0.09656000  |
| H  | 1.18720500  | 1.02912500  | 0.08760600  |
| O  | 1.91733800  | 0.21109600  | -0.14933000 |
| O  | 1.23520500  | -0.87003400 | 0.15857200  |

**PCs1**

|    |             |             |             |
|----|-------------|-------------|-------------|
| Br | 1.27875800  | -0.19827400 | -0.00026500 |
| O  | 0.13531100  | 1.23821800  | 0.00075900  |
| H  | -0.74044800 | 0.82016300  | 0.00161100  |
| O  | -2.31207000 | -0.54894100 | 0.00216000  |
| O  | -3.32525400 | 0.07565300  | -0.00196100 |

**RCs2**

|    |             |             |             |
|----|-------------|-------------|-------------|
| Br | -1.01144000 | -0.11701800 | -0.01943300 |
| O  | 0.52639900  | 0.90185400  | 0.32621800  |
| H  | 1.66100600  | -1.40365200 | -0.19667400 |
| O  | 2.12328700  | -0.65686200 | 0.22089300  |
| O  | 1.56773600  | 0.44241800  | -0.43750700 |

**TSs2**

|    |             |             |             |
|----|-------------|-------------|-------------|
| Br | 1.10556700  | -0.00450500 | 0.01721500  |
| O  | -1.34107200 | 1.05092600  | -0.22099400 |
| H  | -0.31979600 | -0.84425400 | -0.22923100 |
| O  | -1.55295800 | -1.04041800 | -0.16309200 |
| O  | -1.90285100 | 0.11473200  | 0.33742600  |

**PCs2**

|    |             |             |             |
|----|-------------|-------------|-------------|
| Br | 1.38546400  | 0.00242400  | -0.02405100 |
| O  | -1.91241100 | -1.05463300 | 0.16207500  |
| H  | 0.23574400  | -0.18160200 | 0.81073900  |
| O  | -1.89573700 | 1.05642000  | 0.18279100  |
| O  | -2.28272400 | 0.01031000  | -0.34098400 |

**PCt1**

|    |             |             |             |
|----|-------------|-------------|-------------|
| Br | 1.03739500  | -0.30172500 | 0.03483600  |
| O  | 0.46669600  | 1.42579200  | -0.21357000 |
| H  | -0.43843800 | 1.42303200  | 0.13080500  |
| O  | -2.39069700 | 0.33094700  | 0.37520600  |
| O  | -2.55979600 | -0.61457200 | -0.33039300 |

**In Fig. 2****RCWs1**

|    |             |             |             |
|----|-------------|-------------|-------------|
| H  | -2.10856000 | -0.67405400 | -0.61371900 |
| O  | -1.31889200 | -1.25079900 | -0.52290600 |
| O  | -0.85132800 | -0.86933500 | 0.73003000  |
| O  | -3.06687700 | 0.81254300  | -0.13861400 |
| H  | -2.34652700 | 1.33923600  | 0.22982200  |
| H  | -3.53125900 | 1.39627700  | -0.74623400 |
| Br | 1.47893300  | 0.15741900  | -0.12001800 |
| O  | -0.23494200 | 0.36119900  | 0.59783500  |

**TSWs1**

|    |             |             |             |
|----|-------------|-------------|-------------|
| H  | -1.89937100 | 0.45293700  | -0.61214200 |
| O  | -1.58931900 | -0.84255500 | -0.78598300 |
| O  | -1.41064500 | -1.10624300 | 0.43633200  |
| O  | -1.75378000 | 1.39872100  | -0.03455800 |
| H  | -0.95892000 | 0.95679100  | 0.59672100  |
| H  | -1.37986300 | 2.08125000  | -0.60518800 |
| Br | 1.23545000  | 0.02500700  | -0.13749800 |
| O  | -0.12158100 | 0.00429800  | 1.06333600  |

**PCWs1=PCWs2**

|    |             |             |             |
|----|-------------|-------------|-------------|
| H  | -2.25282400 | 0.97416000  | -0.48505000 |
| O  | -2.44328900 | -1.08339200 | -0.21349600 |
| O  | -1.57033100 | -1.10108300 | 0.59915500  |
| O  | -1.60774900 | 1.68737300  | -0.40195700 |
| H  | -2.09325300 | 2.51142400  | -0.49572600 |
| H  | -0.14701700 | 1.32798300  | 0.57958600  |
| Br | 1.25700600  | -0.25347300 | -0.21050600 |
| O  | 0.68360500  | 1.00435200  | 0.98741100  |

**RCWs2**

|    |             |             |             |
|----|-------------|-------------|-------------|
| H  | 1.84759400  | 0.70738600  | -0.25376400 |
| O  | 1.23403100  | 1.48341500  | -0.35132000 |
| O  | 0.26426200  | 1.19330400  | 0.60475700  |
| O  | 2.37548200  | -0.90523300 | -0.08354300 |
| H  | 2.84771600  | -1.16342000 | 0.71389300  |
| H  | 1.51470600  | -1.36536700 | -0.04021400 |
| Br | -0.98577700 | 0.00244200  | -0.07376100 |
| O  | -0.33725100 | -1.55449500 | 0.10032100  |

**TSWs2**

|    |             |             |             |
|----|-------------|-------------|-------------|
| H  | -1.95252900 | -0.12255300 | 0.01055100  |
| O  | -1.44642900 | -1.07718900 | -0.55863700 |
| O  | -0.55076900 | -1.47631800 | 0.24406000  |
| O  | -2.01783500 | 0.94854000  | 0.54911200  |
| H  | -2.76018600 | 1.48282500  | 0.24756900  |
| H  | -1.09370600 | 1.23489000  | 0.01872500  |
| Br | 1.08360700  | 0.04076800  | 0.11074200  |
| O  | 0.00005800  | 1.10221300  | -0.75363800 |

**RCWs3**

|    |             |             |             |
|----|-------------|-------------|-------------|
| Br | -0.07425500 | -1.11861200 | -0.02919700 |
| O  | -0.04696300 | 0.66002900  | 0.56127000  |
| O  | 2.86521700  | 0.98199700  | -0.14545500 |
| H  | 3.38934300  | 1.71990500  | 0.17909700  |
| H  | 1.97733800  | 1.13949500  | 0.19509200  |
| H  | -2.42265300 | 0.65146300  | -0.54426700 |
| O  | -2.10288900 | 1.35776700  | 0.04289400  |
| O  | -0.75850300 | 1.45527700  | -0.30971200 |

**TSWs3**

|    |             |             |            |
|----|-------------|-------------|------------|
| Br | 1.29676600  | 0.00750400  | 0.00526900 |
| O  | -1.12263900 | -0.87873900 | 1.07086700 |
| O  | -1.36189100 | 1.99209300  | 0.03080000 |



|   |             |             |             |
|---|-------------|-------------|-------------|
| H | -1.51258200 | 2.59391700  | -0.70465500 |
| H | -0.40188200 | 1.96270800  | 0.13493200  |
| H | -0.07159600 | -0.73913500 | -0.79216300 |
| O | -1.17764500 | -1.01750300 | -1.02852300 |
| O | -1.76292000 | -0.60586800 | 0.07404000  |

**PCWs3**

|    |             |             |             |
|----|-------------|-------------|-------------|
| Br | -1.79744900 | -0.32178400 | -0.04615400 |
| O  | 1.33844800  | 0.31662200  | 0.97924500  |
| O  | 3.35839900  | -1.27820500 | -0.31582900 |
| H  | 3.88314100  | -2.07333700 | -0.44550300 |
| H  | 2.86049700  | -1.43122100 | 0.49425500  |
| H  | -1.19434400 | 0.90992600  | 0.36731700  |
| O  | 0.88082000  | 1.82287100  | -0.42046100 |
| O  | 1.59251200  | 0.87084800  | -0.09304200 |

**RCWs4**

|    |             |             |             |
|----|-------------|-------------|-------------|
| H  | 0.61214700  | 1.88174500  | -0.11926600 |
| O  | 1.30620200  | 1.20351000  | -0.18048800 |
| O  | 0.90277500  | 0.26244800  | 0.77079500  |
| O  | 3.74073500  | -0.56510600 | -0.28334100 |
| H  | 3.19504900  | 0.15675600  | -0.61334100 |
| H  | 3.26302100  | -0.87847500 | 0.49092900  |
| Br | -1.59789900 | -0.08089500 | -0.09079000 |
| O  | 0.15731900  | -0.69193900 | 0.12045100  |

**TSWs4**

|    |             |             |             |
|----|-------------|-------------|-------------|
| H  | -0.04420400 | 0.56306200  | -0.01558500 |
| O  | -0.90740600 | 1.41627300  | -0.16588700 |
| O  | -1.96320900 | 0.66854300  | -0.31139000 |
| O  | 1.73676200  | 2.05331200  | 0.19980300  |
| H  | 2.27542000  | 2.75881900  | -0.17058500 |
| H  | 2.26185500  | 1.25011700  | 0.10699400  |
| Br | 0.58916200  | -1.01735300 | -0.04531700 |
| O  | -2.00536300 | -0.25870700 | 0.48563300  |

**PCWs4**

|    |             |             |             |
|----|-------------|-------------|-------------|
| H  | 0.63386300  | 0.93490300  | -0.15163400 |
| O  | -1.83151200 | -0.35507000 | -1.05016300 |
| O  | -1.93631100 | -1.01077600 | -0.01231200 |
| O  | -0.56749400 | 2.26070600  | -0.08956300 |
| H  | -1.34905800 | 1.71086600  | 0.05219200  |
| H  | -0.45448700 | 2.75932200  | 0.72723600  |
| Br | 1.44847400  | -0.26755200 | 0.00388300  |

|   |             |             |            |
|---|-------------|-------------|------------|
| O | -1.85554600 | -0.39995400 | 1.05657700 |
|---|-------------|-------------|------------|

### RCWWs1

|    |             |             |             |
|----|-------------|-------------|-------------|
| Br | -1.29851400 | -0.50637900 | -0.07955800 |
| O  | -0.68089800 | 1.11043700  | 0.64833800  |
| O  | 1.80974300  | -0.94688400 | 1.42933000  |
| H  | 2.49065500  | -0.96192300 | 2.10851400  |
| H  | 1.51718800  | -0.02466000 | 1.37515900  |
| H  | 1.49271600  | 0.71049700  | -0.79851500 |
| O  | 1.37306200  | 1.45500800  | -0.15330800 |
| O  | 0.03441000  | 1.81731700  | -0.29005400 |
| O  | 2.02771700  | -0.85965400 | -1.34081000 |
| H  | 2.04360400  | -1.20956900 | -0.43056200 |
| H  | 1.39156300  | -1.40087600 | -1.81803000 |

### TSWWs1

|    |             |             |             |
|----|-------------|-------------|-------------|
| Br | -1.80866200 | 0.04536400  | -0.07318400 |
| O  | -0.18797900 | -0.17245500 | 0.70869900  |
| O  | 1.16182600  | 1.76914100  | 0.07585700  |
| H  | 0.82274900  | 2.12330700  | -0.75503900 |
| H  | 2.17729100  | 1.20007000  | -0.08800200 |
| H  | 0.50268400  | 0.97203900  | 0.38711700  |
| O  | 1.79537500  | -1.58888200 | 0.17587700  |
| O  | 0.77282400  | -1.17333600 | -0.43000100 |
| O  | 3.12096500  | 0.42453300  | -0.20597300 |
| H  | 2.66715700  | -0.53730400 | -0.00551600 |
| H  | 3.82918600  | 0.58215500  | 0.42721900  |

### PCWWs1

|    |             |             |             |
|----|-------------|-------------|-------------|
| Br | 1.81954500  | -0.21852500 | -0.01262900 |
| O  | 0.09841800  | -0.45441900 | -0.60731000 |
| O  | -1.18795100 | 0.50821700  | 1.60165900  |
| H  | -1.22516600 | 1.32881400  | 1.07504100  |
| H  | -0.60217700 | 0.69676400  | 2.34130500  |
| H  | -0.42948300 | -0.36125300 | 0.22196900  |
| O  | -2.61166100 | -1.52604100 | -0.00148600 |
| O  | -2.75401600 | -0.49380000 | -0.57526000 |
| O  | -0.94508000 | 2.22102700  | -0.55372800 |
| H  | -0.57646000 | 1.42488100  | -0.96946900 |
| H  | -1.64846700 | 2.51930700  | -1.13781600 |

### TSWWs3

|    |             |             |             |
|----|-------------|-------------|-------------|
| Br | -0.01296100 | -1.13797100 | -0.28171500 |
| O  | -2.20703700 | 0.03335800  | 0.93310700  |

|   |             |             |             |
|---|-------------|-------------|-------------|
| O | 3.07776800  | 0.04648500  | 0.71210500  |
| H | 2.34120600  | -0.57203600 | 0.60429100  |
| H | 3.26691900  | 0.05408700  | 1.65558600  |
| H | -0.36156600 | 0.54098800  | -0.16837100 |
| O | -1.12089400 | 1.49405200  | -0.13083800 |
| O | -2.26460000 | 0.91319300  | 0.08652900  |
| O | 1.43102200  | 2.02388400  | -0.45446100 |
| H | 2.13264500  | 1.47396400  | -0.06686500 |
| H | 1.74434800  | 2.24419900  | -1.33614700 |

### PCWWs3

|    |             |             |             |
|----|-------------|-------------|-------------|
| Br | 1.35870100  | -0.51008600 | 0.06760500  |
| O  | -1.58218300 | -1.16105600 | 0.77574500  |
| O  | -0.99493000 | 1.73491000  | 1.22047300  |
| H  | -0.42605000 | 1.92912100  | 1.97578800  |
| H  | -1.01307800 | 0.76042100  | 1.17001900  |
| H  | 0.85508000  | 1.07526400  | -0.65984000 |
| O  | -1.71151400 | -0.14078200 | -1.06358300 |
| O  | -1.85055400 | -1.19722300 | -0.42803200 |
| O  | 0.33103300  | 2.03490700  | -0.89321500 |
| H  | -0.29284700 | 2.05004000  | -0.06528700 |
| H  | -0.21248000 | 1.87212900  | -1.67796600 |

### RCWWs2

|    |             |             |             |
|----|-------------|-------------|-------------|
| Br | -0.20723100 | -0.82724600 | -0.01084700 |
| O  | 1.39973800  | -1.35978100 | 0.05242500  |
| O  | -2.62841500 | 0.53982900  | -0.54569800 |
| H  | -3.29036300 | 0.65533000  | 0.14374200  |
| H  | -2.09240200 | 1.34475700  | -0.51100300 |
| H  | 0.84451300  | 1.82612200  | -0.09242700 |
| O  | -0.11546800 | 1.85210500  | 0.16797300  |
| O  | -0.20984100 | 0.73624300  | 1.00426500  |
| O  | 2.35110400  | 1.16699100  | -0.52070800 |
| H  | 3.15262400  | 1.44094400  | -0.06558900 |
| H  | 2.26176200  | 0.20337300  | -0.36111200 |

### TSWWs2

|    |             |             |             |
|----|-------------|-------------|-------------|
| Br | -0.14504300 | -0.87997200 | 0.00599400  |
| O  | 1.59742800  | -1.05297000 | 0.03080800  |
| O  | -2.56072400 | 0.42217000  | -0.57488600 |
| H  | -3.29232700 | 0.54065100  | 0.03882700  |
| H  | -2.01260000 | 1.21782000  | -0.46623300 |
| H  | 1.02603900  | 1.68206600  | -0.22765300 |
| O  | -0.19655100 | 1.83228300  | 0.21069700  |

|   |             |            |             |
|---|-------------|------------|-------------|
| O | -0.25870200 | 0.76054000 | 1.02461400  |
| O | 2.00399700  | 1.24093600 | -0.58053500 |
| H | 2.74287300  | 1.66712000 | -0.13381100 |
| H | 1.92894500  | 0.06768600 | -0.30649200 |

**PCWwS2**

|    |             |             |             |
|----|-------------|-------------|-------------|
| Br | -0.71343700 | -0.74326100 | -0.04293200 |
| O  | 0.52076000  | -2.03821700 | -0.45337900 |
| O  | -2.30556100 | 1.47802300  | 0.42920500  |
| H  | -1.74006100 | 2.09548300  | -0.04853900 |
| H  | -3.14859300 | 1.49230000  | -0.03556000 |
| H  | 3.00244800  | 0.10138900  | 0.10638000  |
| O  | 1.50146100  | 2.07916600  | -0.77439400 |
| O  | 0.72421300  | 1.89781100  | 0.11287300  |
| O  | 2.51264500  | -0.43865500 | 0.73636700  |
| H  | 1.88606500  | 0.17509400  | 1.14112300  |
| H  | 1.34229600  | -1.67517300 | -0.06616400 |

**In Fig. 3**

**RCWt1**

|    |             |             |             |
|----|-------------|-------------|-------------|
| Br | 1.31055300  | -0.19514900 | -0.19765200 |
| O  | 0.65944600  | 0.93391600  | 0.94667300  |
| O  | -1.76017300 | 1.59562600  | -0.39898900 |
| H  | -2.34059500 | 2.21385200  | 0.05553900  |
| H  | -0.98705000 | 1.48335800  | 0.18244800  |
| H  | -2.28840000 | -0.00329900 | -0.52257400 |
| O  | -2.32737800 | -0.98616300 | -0.36117300 |
| O  | -1.60355900 | -1.15134300 | 0.71379000  |

**TSWt1**

|    |             |             |             |
|----|-------------|-------------|-------------|
| Br | 1.40410700  | -0.03673200 | -0.15150700 |
| O  | 0.03711200  | 0.28339100  | 0.95978600  |
| O  | -1.75190100 | 1.51605000  | -0.23299900 |
| H  | -2.28309200 | 2.08855900  | 0.33170300  |
| H  | -0.92742800 | 1.20398300  | 0.30050200  |
| H  | -2.22064400 | 0.30320600  | -0.37696600 |
| O  | -2.35543500 | -0.81140800 | -0.39326000 |
| O  | -1.39385000 | -1.27679800 | 0.29741100  |

**PCWt1**

|    |             |             |             |
|----|-------------|-------------|-------------|
| Br | 1.21475200  | -0.26273800 | -0.20102300 |
| O  | 0.23008500  | 0.24736900  | 1.25594800  |
| O  | -1.03809500 | 2.31814500  | -0.08503700 |

|   |             |             |             |
|---|-------------|-------------|-------------|
| H | -1.79111800 | 1.94010500  | -0.55266600 |
| H | -0.26669600 | 1.02145100  | 0.91436500  |
| H | -0.41159200 | 2.56281600  | -0.77544700 |
| O | -2.17788200 | -0.57569900 | -0.46683100 |
| O | -2.01997300 | -1.53088300 | 0.22711300  |

**RCWt2**

|    |             |             |             |
|----|-------------|-------------|-------------|
| H  | 1.40862200  | -0.25600200 | 0.43673600  |
| O  | 1.98521300  | -1.03128900 | 0.22536000  |
| O  | 2.99322000  | -0.55758700 | -0.45092500 |
| O  | 1.40977500  | 1.63528400  | -0.03774100 |
| H  | 1.59832700  | 2.31725200  | 0.61416300  |
| H  | 2.26841500  | 1.37802300  | -0.40728500 |
| Br | -1.48481500 | -0.08316900 | -0.23812900 |
| O  | -0.55156300 | -0.11245000 | 1.22466700  |

**TSWt2**

|    |             |             |             |
|----|-------------|-------------|-------------|
| H  | 0.98553100  | -1.13199600 | 0.70623700  |
| O  | 1.87904700  | -1.26660300 | 0.22812600  |
| O  | 1.81764400  | -0.57731400 | -0.85819400 |
| O  | 1.21010400  | 2.05771300  | 0.29652300  |
| H  | 1.89313500  | 2.68530800  | 0.55057900  |
| H  | 1.65778600  | 1.40571100  | -0.25581000 |
| Br | -1.15443000 | 0.02970100  | -0.21766900 |
| O  | -0.42322200 | -0.71361400 | 1.16072000  |

**PCWt2**

|    |             |             |             |
|----|-------------|-------------|-------------|
| H  | 2.60656900  | -1.16390200 | 0.71566800  |
| O  | -2.27117400 | -1.58425100 | 0.07680000  |
| O  | -2.76301100 | -0.51142700 | -0.08397600 |
| O  | -1.03141200 | 2.07813600  | 0.11200700  |
| H  | -0.84409500 | 2.77270000  | -0.52827400 |
| H  | -1.83550200 | 1.65120200  | -0.20312800 |
| Br | 0.89283000  | 0.17405500  | 0.00977000  |
| O  | 2.16859700  | -1.15144900 | -0.14560600 |

**RCWWt1**

|    |             |             |             |
|----|-------------|-------------|-------------|
| Br | -1.34133800 | -0.31621000 | -0.02752700 |
| O  | -0.41657800 | -1.78655500 | -0.03164400 |
| O  | -2.66560000 | 2.02574700  | -0.07894000 |
| H  | -3.49200900 | 2.27265000  | 0.34804500  |
| H  | -2.14713000 | 2.83560500  | -0.13160200 |
| H  | 1.24411500  | -1.30396500 | -0.31403700 |
| O  | 2.08602000  | -0.78124200 | -0.27780400 |

|   |            |             |             |
|---|------------|-------------|-------------|
| O | 1.93931300 | -0.00826600 | 0.76510200  |
| O | 4.44943600 | 1.25997200  | -0.17141700 |
| H | 4.53121200 | 0.63060200  | -0.89395800 |
| H | 3.66990300 | 0.95521000  | 0.31263000  |

### TSWWt1

|    |             |             |             |
|----|-------------|-------------|-------------|
| Br | -1.30268500 | -0.34410200 | -0.00716500 |
| O  | -0.34542300 | -1.78959600 | 0.01220600  |
| O  | -2.72647300 | 1.96483100  | -0.07562600 |
| H  | -2.98522300 | 2.42032200  | 0.73238700  |
| H  | -2.35731400 | 2.64604500  | -0.64786200 |
| H  | 1.12075100  | -1.30435900 | -0.14748400 |
| O  | 1.99485100  | -0.78402700 | -0.09061100 |
| O  | 1.67496000  | 0.41259600  | 0.28250800  |
| O  | 4.57808200  | 1.07708300  | -0.06450700 |
| H  | 4.77553800  | 0.17373600  | -0.32866600 |
| H  | 3.63224600  | 1.06072100  | 0.13065300  |

### PCWWt1

|    |             |             |             |
|----|-------------|-------------|-------------|
| Br | 0.90429700  | -0.35999100 | -0.22777300 |
| O  | -0.54875000 | -1.37192400 | -0.76816500 |
| O  | 3.01871500  | 1.03572900  | 0.64498400  |
| H  | 2.80518800  | 1.40288300  | 1.50964300  |
| H  | 3.78275400  | 0.46809800  | 0.79253500  |
| H  | -1.07737200 | -0.76192100 | -1.30368100 |
| O  | -2.16606700 | 1.18217100  | -0.85637200 |
| O  | -1.98872500 | 1.83021900  | 0.12711500  |
| O  | -2.41357000 | -0.88398700 | 1.37599400  |
| H  | -2.62741400 | -1.58315200 | 1.99951800  |
| H  | -1.74638300 | -1.26387800 | 0.78558900  |

### RCWWt2

|    |             |             |             |
|----|-------------|-------------|-------------|
| Br | 1.06957300  | 0.25644100  | -0.00281400 |
| O  | 1.68695000  | -1.36962800 | 0.10242400  |
| O  | -0.36682600 | 2.53073100  | -0.10361900 |
| H  | -1.24584400 | 2.12432000  | -0.15852200 |
| H  | -0.43842400 | 3.22866900  | 0.55458000  |
| H  | -1.80704800 | -1.10610300 | 0.45771500  |
| O  | -2.21820900 | -0.21155200 | 0.65675700  |
| O  | -2.22344000 | 0.39819300  | -0.49646600 |
| O  | -0.97411700 | -2.40373400 | -0.11417000 |
| H  | -1.16600000 | -2.52342900 | -1.05051400 |
| H  | -0.01259900 | -2.25098700 | -0.06419100 |

**TSWWt2**

|    |             |             |             |
|----|-------------|-------------|-------------|
| Br | -0.51003200 | 0.81739000  | 0.04100900  |
| O  | 0.95190400  | 1.69253600  | -0.30219700 |
| O  | -2.60820700 | -0.90978000 | 0.20280100  |
| H  | -2.16469300 | -1.65610900 | -0.22245300 |
| H  | -3.45667600 | -0.83212900 | -0.24639100 |
| H  | 1.82796600  | -1.20251500 | 0.12845900  |
| O  | 1.19285100  | -2.12302300 | 0.00886500  |
| O  | 0.01393800  | -1.74280200 | -0.30229100 |
| O  | 2.53328300  | -0.12471400 | 0.13397500  |
| H  | 3.05983700  | 0.01068400  | 0.92768900  |
| H  | 1.91453700  | 0.73368300  | 0.04817700  |

**PCWWt2**

|    |             |             |             |
|----|-------------|-------------|-------------|
| Br | -0.56344000 | -0.81107100 | -0.01988900 |
| O  | -2.31079000 | -0.31939400 | -0.30508200 |
| O  | 2.08315900  | -1.51459100 | 0.38351500  |
| H  | 2.42828400  | -1.68579100 | -0.49966000 |
| H  | 2.09304100  | -2.37023100 | 0.82543100  |
| H  | -0.56526100 | 2.02825300  | 0.35411800  |
| O  | 1.82468100  | 1.62802200  | 0.30031500  |
| O  | 2.34521900  | 1.25034500  | -0.70205000 |
| O  | -1.47175800 | 2.33196400  | 0.21693400  |
| H  | -1.72247600 | 2.75610900  | 1.04400700  |
| H  | -2.27729600 | 0.64836600  | -0.17683700 |
